# Supplementary material
Source: publisher site journal article supplement (https://www.dovepress.com/article/440282)
Supplement: Supplementary file 1 [file get_supplementary_file.php]

**Supplementary File**

**A systematic review of the economic burden of diabetes in Eastern Mediterranean region countries**

Muhammad Subhan Arshad1,2, Faleh Alqahtani3* and Muhammad Fawad Rasool1*

1 Department of Pharmacy Practice, Faculty of Pharmacy, Bahauddin Zakariya University, 60800, Multan, Pakistan

2 Department of Pharmacy, Southern Punjab Institute of Health Sciences, 60000, Multan, Pakistan

3 Department of Pharmacology and Toxicology, College of Pharmacy, King Saud University, Riyadh 11451, Saudi Arabia

*Corresponding Authors:

Muhammad Fawad Rasool, Email: [fawadrasool@bzu.edu.pk](mailto:fawadrasool@bzu.edu.pk) and

Faleh Alqahtani, Email: [afaleh@ksu.edu.sa](mailto:afaleh@ksu.edu.sa)

Supplementary Table S1. Quality assessment of eligible studies.

| **Criteria** | | | Al-Maskari et al. (2010) [1] | Butt et al. (2022) [2] | Javanbakht et al (2011) [3] | Gillani et al. (2018) [4] | **Hussain et al. (2014) [5]** | Elrayah-Eliadarous et al. (2010) [6] | Elnilet al. (2019) [7] | Almutairi et al. (2013) [8] | Elrayah-Eliadarous et al. (2017) [9] | Davari et al (2016) [10] | Alhowaish et al (2013) [11] |
| --- | --- | --- | --- | --- | --- | --- | --- | --- | --- | --- | --- | --- | --- |
| **General** | | |  |  |  |  |  |  |  |  |  |  |  |
| 1 | Is the definition clear and precise? | 1 = the definition of the type of diabetes considered is clear and all the morbidities and co-morbidities considered are listed. | 0 | 0 | 1 | 1 | **0** | 0 | 0 | 1 | 0 | 0 | 0 |
| 0 = the definition is vague and do not include any details of all the morbidities and co-morbidities considered |
| 2 | Which complications the authors have included? | 1 = more than 4 complications are considered and specified. | 1 | 0 | 1 | 0 | **0** | 0 | 0 | 0 | 0 | 0 | 0 |
| 0,5 = up to 3 complications are considered for each patient but they are not specified. |
| 0 = no complications are considered or if they are considered there is no clear documentation in their inclusion. |
| **Sample** | | |  |  |  |  |  |  |  |  |  |  |  |
| 3 | Are sources for population data reliable? | 1 = self-assessment and questionnaire are confirmed by hospital records or hospitals and practitioners bills. | 0.5 | 1 | 1 | 1 | **0.5** | 0.5 | 0.5 | 0.5 | 0.5 | 1 | 0.5 |
| 0,5 = The only sources of data are questionnaire and self-assessment. |
| 0 = The sources of data are not defined or are subject to a number of biases. |
| 4 | The period of study is appropriate? | A period of evaluation is considered appropriate if is equal or more than | 1 | 0 | 1 | 1 | **0** | 1 | 1 | 1 | 0 | 1 | 1 |
| 6 months for prevalence- based studies and consider more than 1 year for incidence based studies. |
| **Costs** | | |  |  |  |  |  |  |  |  |  |  |  |
| 5 | Does the study include the relevant costs? | 1 = the costs included are relevant for the objective of the stud. (minimum of 80% of the costs included in the section costs of this table) | 0.5 | 1 | 1 | 1 | **0** | 0 | 1 | 1 | 0.5 | 0.5 | 0.5 |
| 0,5 = the inclusion of the costs is partial |
| 0 = there are missing a large number of costs that should be included or there is no specification of the costs included |
| 6 | Are the inclusion of the costs appropriate for the objective of the study? | 1 = considering the aim, all the necessary type of costs are included. (for ex for the evaluation of direct costs of a drug treatment all the costs borne by the patients directly and by the health care are included) | 0 | 1 | 1 | 1 | **0** | 0.5 | 0.5 | 1 | 0.5 | 0.5 | 0.5 |
| 0,5 = Only partial relevant costs are included. There are missing of some important costs related to the aim of the study. |
| 0 = Although the study aim is to consider a general costs of diabetes or a costs of drug or complications there are included only a category of costs (for ex direct costs). |
| 7 | Has the Diabetes severity Index been used? | 1 = Yes | 0 | 0 | 0 | 0 | **0** | 0 | 0 | 0 | 0 | 0 | 0 |
| 0 =No |
| 8 | Is adequate documentation and justification given for cost components, data and sources, assumptions and methods? | 1 = detailed justifications are given for all the approach and methods adopted. The exclusion and inclusion of categories of cost and data are well motivated. All the sources are documented | 0.5 | 1 |  | 1 | **0** | 0.5 | 0.5 | 1 | 0.5 | 0.5 | 0.5 |
| 0,5 = partial justification is given for the methods and approach adopted. There is limited or absence of justifications for the inclusion or exclusion of costs. The documentation is scarce and not precise. |
| 0 = absence or minimal presence of documentation and justification |
| 9 | Are important limitations discussed regarding the cost components, data, assumptions and methods? | 1 = all the most important limitations are discussed. In same cases some minor limitation is discussed. | 1 | 1 | 1 | 1 | **0.5** | 0.5 | 0.5 | 0 | 1 | 0.5 | 1 |
| 0,5 = one or only not important limitations are discussed. |
| 0 = there is no discussion around the limitations of the study. |
| **Methods** | | |  |  |  |  |  |  |  |  |  |  |  |
| 10 | Is the data representative of the study population? | 1 = prevalence-based | 1 | 1 | 1 | 1 | **1** | 1 | 1 | 1 | 1 | 1 | 1 |
| 0, 5 = Incidence based |
| 0 = no definition of the approach considered |
| 11 | Was the approach appropriate? | 1 = bottom-up approach. | 1 | 1 | 1 | 1 | **1** | 1 | 1 | 1 | 1 | 1 | 1 |
| 0,5 = top down. |
| 0 = no approach defined/ or impossibility to infer the approach employed |
| 12 | Is the estimation method of the cost of diabetes appropriate? | 1 = Incremental costs method. | 0.5 | 0.5 | 0.5 | 0.5 | **0** | 0.5 | 0.5 | 0.5 | 0.5 | 0.5 | 0.5 |
| 0,5 = Total disease costs |
| 0 = no methods designed or impossibility to retrieved a clear method from the study. |
| 13 | Are the deviation standard and the means calculated? | 1 = both, standard deviation and Means are calculated. 0,5: only one of them is calculated. | 1 | 0.5 | 1 | 1 | **0** | 1 | 0.5 | 1 | 1 | 1 | 0 |
| 0: none of them is calculated |
| 14 | Is a sensitivity analysis performed? | 1 = the sensitivity analysis is performed and the results are clearly shown. | 0.5 | 0.5 | 0.5 | 0 | **0** | 0 | 0 | 0.5 | 0 | 0 | 0 |
| 0,5 = some linear regression method are employed to correlate the variables |
| 0 = no sensitivity analysis or linear regression are performed. |
| 15 | Which statistical methods are used | 1 = the statistical analysis is performed with consistent statistical formulas. The formulas used should non-parametrical statistical hypothesis test. | 1 | 1 | 1 | 1 | **0** | 0 | 0 | 1 | 1 | 0 | 0 |
| Total Score | | | 9.5 | 9.5 | 11 | 11.5 | **3** | 6.5 | 7 | 10.5 | 7.5 | 7.5 | 6.5 |

Note: Score >10 = Good quality; Score 5-10 = Intermediate quality; Score < 5 = Poor quality; Bold font indicates poor quality so the study didn’t included in the review.

**References**

1. Al-Maskari, F., M. El-Sadig, and N. Nagelkerke, *Assessment of the direct medical costs of diabetes mellitus and its complications in the United Arab Emirates.* BMC public health, 2010. **10**(1): p. 1-10.

2. Butt, M.D., et al., *Cost of Illness Analysis of Type 2 Diabetes Mellitus: The Findings from a Lower-Middle Income Country.* International Journal of Environmental Research and Public Health, 2022. **19**(19): p. 12611.

3. Javanbakht, M., et al., *Cost-of-illness analysis of type 2 diabetes mellitus in Iran.* PloS one, 2011. **6**(10): p. e26864.

4. Gillani, A.H., et al., *Direct and indirect cost of diabetes care among patients with type 2 diabetes in private clinics: a multicenter study in Punjab, Pakistan.* Expert review of pharmacoeconomics & outcomes research, 2018. **18**(6): p. 647-653.

5. Hussain, M., et al., *Direct cost of treatment of diabetes mellitus type 2 in Pakistan.* Int J Pharm Pharm Sci, 2014. **6**(11): p. 261-4.

6. Elrayah-Eliadarous, H., et al., *Direct costs for care and glycaemic control in patients with type 2 diabetes in Sudan.* Experimental and clinical endocrinology & diabetes, 2010: p. 220-225.

7. Elnil, M., Z. Swaraldahab, and S.I. Abdelaziz, *Direct Financial Cost of Diabetes Mellitus among Adult Sudanese Patients in Khartoum State 2016-2017.* Asian Journal of Medicine and Health, 2019. **14**(2): p. 1-8.

8. Almutairi, N. and K.M. Alkharfy, *Direct medical cost and glycemic control in type 2 diabetic Saudi patients.* Applied health economics and health policy, 2013. **11**: p. 671-675.

9. Elrayah‐Eliadarous, H.A., et al., *Economic and social impact of diabetes mellitus in a low‐income country: A case‐control study in S udan.* Journal of diabetes, 2017. **9**(12): p. 1082-1090.

10. Davari, M., et al., *The direct medical costs of outpatient cares of type 2 diabetes in Iran: A retrospective study.* International journal of preventive medicine, 2016. **7**.

11. Alhowaish, A.K.J.J.o.f. and c. medicine, *Economic costs of diabetes in Saudi Arabia.* 2013. **20**(1): p. 1.
